# Supplementary material for: The Krüppel-like factor 9 (KLF9) network in HEC-1-A endometrial carcinoma cells suggests the carcinogenic potential of dys-regulated KLF9 expression
Source: PubMed Central journal article supplement (PMC2542371; doi:10.1186/1477-7827-6-41), 2008-09-10
Supplement: 1477-7827-6-41-S1.pdf [file 1477-7827-6-41-S1.pdf]

**Table 1. RNAs that are more highly expressed in KLF9 AS HEC-1-A sub-lines.**

| Gene Symbol                             | Gene Name                                                              | Affy ID     | 9S vs. 3AS (fold) | 4S vs. 2AS (fold) | Category/Function/Location                                                     |
|-----------------------------------------|------------------------------------------------------------------------|-------------|-------------------|-------------------|--------------------------------------------------------------------------------|
| <u>Metabolism</u>                       |                                                                        |             |                   |                   |                                                                                |
| AKR7A2                                  | Aldo-keto reductase family 7, member A2 (aflatoxin aldehyde reductase) | 214259_S_AT | 0.387             | 0.491             | Aldehyde metabolism, detoxification of aldehydes and ketones                   |
| ALDH1A1                                 | Aldehyde dehydrogenase 1 family, member A1                             | 212224_AT   | 0.068             | 0.174             | Aldehyde and alcohol metabolism                                                |
| GLS                                     | Glutaminase                                                            | 203158_S_AT | 0.135             | 0.349             | D-glutamine and D-glutamate metabolism                                         |
| IDS                                     | Iduronate 2-sulfatase (Hunter syndrome)                                | 206342_X_AT | 0.334             | 0.407             | Heparan sulfate and dermatan sulfate metabolism                                |
| MLSTD1                                  | Male sterility domain containing 1                                     | 220615_S_AT | 0.463             | 0.348             | Fatty alcohol biosynthesis                                                     |
| OGDHL                                   | Oxoglutarate dehydrogenase-like                                        | 219277_S_AT | 0.282             | 0.430             | Succinyl-transferring                                                          |
| SULT1A1                                 | Sulfotransferase family, cytosolic, 1A, phenol-preferring, member 1    | 215299_X_AT | 0.394             | 0.499             | Sulfur metabolism, phase II metabolism of drugs and xenobiotics                |
| <u>Cytoskeleton, motility, adhesion</u> |                                                                        |             |                   |                   |                                                                                |
| ANK3                                    | Ankyrin 3, node of Ranvier (ankyrin G)                                 | 206385_S_AT | 0.334             | 0.325             | Cytoskeleton-membrane protein interactions                                     |
| CD24                                    | CD24 molecule                                                          | 208650_S_AT | 0.033             | 0.148             | Membrane-associated sialoglycoprotein                                          |
| CYFIP2                                  | Cytoplasmic FMR1 interacting protein 2                                 | 215785_S_AT | 0.466             | 0.452             | Cytoskeleton regulation, apoptosis                                             |
| GNE                                     | Glucosamine (UDP-N-acetyl)-2-epimerase/N-acetylmannosamine kinase      | 205042_AT   | 0.100             | 0.295             | Sialic acid biosynthesis, cell adhesion, signaling                             |
| ITGB8                                   | Integrin, beta 8                                                       | 205816_AT   | 0.383             | 0.486             | Cell adhesion, migration, and matrix association                               |
| MFAP3L                                  | Microfibrillar-associated protein 3-like                               | 205442_AT   | 0.368             | 0.348             | Integral to membrane                                                           |
| <u>Transport</u>                        |                                                                        |             |                   |                   |                                                                                |
| ABCC4                                   | ATP-binding cassette, sub-family C (CFTR/MRP), member 4                | 203196_AT   | 0.290             | 0.308             | Transporter, cellular detoxification                                           |
| ACBD3                                   | Acyl-Coenzyme A binding domain containing 3                            | 202324_S_AT | 0.233             | 0.299             | Golgi resident protein, hormonal regulation of steroidogenesis, numb signaling |
| SEC14L1                                 | SEC14-like 1 ( <i>S. cerevisiae</i> )                                  | 202083_S_AT | 0.457             | 0.500             | Intracellular transport                                                        |
| <u>Signal transduction</u>              |                                                                        |             |                   |                   |                                                                                |
| FZD5                                    | Frizzled homolog 5 ( <i>Drosophila</i> )                               | 221245_S_AT | 0.380             | 0.440             | Wnt5A receptor                                                                 |
| RAB25                                   | RAB25, member RAS oncogene family                                      | 218186_AT   | 0.082             | 0.076             | Transcytosis, migration, invasion, anti-apoptosis                              |

Transcription factors

|       |                                                           |             |       |       |
|-------|-----------------------------------------------------------|-------------|-------|-------|
| PAX2  | Paired box 2                                              | 206228_AT   | 0.382 | 0.247 |
| STAT1 | Signal transducer and activator of transcription 1, 91kDa | 209969_S_AT | 0.322 | 0.495 |

Other

|          |                                     |             |       |       |                              |
|----------|-------------------------------------|-------------|-------|-------|------------------------------|
| CALB1    | Calbindin 1, 28kDa                  | 205625_S_AT | 0.092 | 0.428 | Calcium binding              |
| C12orf29 | Chromosome 12 open reading frame 29 | 213701_AT   | 0.406 | 0.343 |                              |
| C1orf186 | Chromosome 1 open reading frame 186 | 222281_S_AT | 0.265 | 0.155 | Putative membrane-associated |
| METTL7A  | Methyltransferase like 7A           | 207761_S_AT | 0.266 | 0.211 |                              |

---
