# Supplementary material for: The Krüppel-like factor 9 (KLF9) network in HEC-1-A endometrial carcinoma cells suggests the carcinogenic potential of dys-regulated KLF9 expression
Source: PubMed Central journal article supplement (PMC2542371; doi:10.1186/1477-7827-6-41), 2008-09-10
Supplement: 1477-7827-6-41-S2.pdf [file 1477-7827-6-41-S2.pdf]

**Table 2. RNAs that are more highly expressed in KLF9 S HEC-1-A sub-lines.**

| Gene Symbol                             | Gene Name                                                                | Affy ID     | 9S vs. 3AS (fold) | 4S vs. 2AS (fold) | Category/Function/Location                                                 |
|-----------------------------------------|--------------------------------------------------------------------------|-------------|-------------------|-------------------|----------------------------------------------------------------------------|
| <u>Metabolism</u>                       |                                                                          |             |                   |                   |                                                                            |
| NT5E                                    | 5'-nucleotidase, ecto (CD73)                                             | 203939_AT   | 2.985             | 6.410             | Generation of adenosine                                                    |
| PSAT1                                   | Phosphoserine aminotransferase 1                                         | 220892_S_AT | 6.897             | 2.278             | Serine biosynthesis, "progesterone-induced protein"                        |
| UPP1                                    | Uridine phosphorylase 1                                                  | 203234_AT   | 3.257             | 2.786             | Pyrimidine metabolism                                                      |
| <u>Cytoskeleton, motility, adhesion</u> |                                                                          |             |                   |                   |                                                                            |
| AMIGO2                                  | Adhesion molecule with Ig-like domain 2                                  | 222108_AT   | 2.740             | 2.227             | Cell adhesion and migration                                                |
| CD44                                    | CD44 antigen (Indian blood group system)                                 | 204489_S_AT | 3.145             | 2.101             | Cell adhesion and migration, signal transduction, hyaluronic acid receptor |
| COL4A1                                  | Collagen, type IV, alpha 1                                               | 211980_AT   | 2.179             | 3.584             | Basement membrane                                                          |
| COL4A2                                  | Collagen, type IV, alpha 2                                               | 211964_AT   | 2.725             | 7.692             | Basement membrane                                                          |
| COTL1                                   | Coactosin-like 1 (Dictyostelium)                                         | 221059_S_AT | 3.663             | 2.770             | Regulation of actin cytoskeleton                                           |
| FSCN1                                   | Fascin homolog 1, actin-bundling protein (Strongylocentrotus purpuratus) | 201564_S_AT | 2.618             | 2.950             | Actin cytoskeleton, proliferation                                          |
| FXVD5                                   | FXVD domain containing ion transport regulator 5                         | 218084_X_AT | 3.356             | 3.484             | Actin cytoskeleton, cell motility                                          |
| HSPB1                                   | Heat shock 27kDa protein 1                                               | 201841_S_AT | 2.674             | 5.587             | Anti-apoptosis, cell motility                                              |
| LAMC2                                   | Laminin, gamma 2                                                         | 202267_AT   | 3.676             | 3.003             | Basement membrane, cell adhesion                                           |
| MYO10                                   | Myosin X                                                                 | 201976_S_AT | 2.421             | 9.174             | Cytoskeleton, signal transduction                                          |
| NID2                                    | Nidogen 2 (osteonidogen)                                                 | 204114_AT   | 3.413             | 6.173             | Basement membrane                                                          |
| PCDH1                                   | Protocadherin 1 (cadherin-like 1)                                        | 203918_AT   | 2.506             | 2.688             | Cell adhesion                                                              |
| TM4SF1                                  | Transmembrane 4 L six family member 1                                    | 209386_AT   | 3.125             | 4.115             | Signal transduction, cell growth and motility (tetraspanin family)         |
| TNC                                     | Tenascin C (hexabrachion)                                                | 201645_AT   | 5.291             | 18.904            | Cell adhesion                                                              |
| VCAN                                    | Versican                                                                 | 215646_S_AT | 6.494             | 6.211             | Cell adhesion, extracellular matrix                                        |
| <u>Transport</u>                        |                                                                          |             |                   |                   |                                                                            |
| ATP2C2                                  | ATPase, Ca <sup>++</sup> transporting, type 2C, member 2                 | 206043_S_AT | 2.257             | 2.732             | Calcium transport, secretory pathway                                       |
| ATP9A                                   | ATPase, Class II, type 9A                                                | 212062_AT   | 2.024             | 4.975             | Phospholipid transport                                                     |

|          |                                                                                           |             |        |        |                                   |
|----------|-------------------------------------------------------------------------------------------|-------------|--------|--------|-----------------------------------|
| CLIC4    | Chloride intracellular channel 4                                                          | 201560_AT   | 11.710 | 21.459 | Chloride transport, pro-apoptosis |
| KCNN4    | Potassium intermediate/small conductance calcium-activated channel, subfamily N, member 4 | 204401_AT   | 2.538  | 3.610  | Potassium channel                 |
| NAPA     | N-ethylmaleimide-sensitive factor attachment protein, alpha                               | 208751_AT   | 6.993  | 2.132  | Intracellular protein transport   |
| SLC25A37 | Solute carrier family 25, member 37                                                       | 221920_S_AT | 2.299  | 2.994  | Iron transport, mitochondrial     |
| SLC26A2  | Solute carrier family 26 (sulfate transporter), member 2                                  | 205097_AT   | 3.623  | 3.846  | Sulfate transporter               |

### Signal transduction

|          |                                                             |             |       |       |                                                               |
|----------|-------------------------------------------------------------|-------------|-------|-------|---------------------------------------------------------------|
| BCAR3    | Breast cancer anti-estrogen resistance 3                    | 204032_AT   | 2.611 | 2.488 | GDP exchange factor, stress pathway, motility                 |
| MAPKAPK3 | Mitogen-activated protein kinase-activated protein kinase 3 | 202787_S_AT | 3.831 | 3.861 | Serine-threonine kinase, mitogenic and stress pathways        |
| PSD3     | Pleckstrin and Sec7 domain containing 3                     | 218613_AT   | 4.082 | 3.125 |                                                               |
| ROR1     | Receptor tyrosine kinase-like orphan receptor 1             | 205805_S_AT | 4.630 | 3.049 | ROR subfamily of receptors                                    |
| SH2B3    | SH2B adaptor protein 3                                      | 203320_AT   | 3.484 | 4.115 | Modulator of receptor tyrosine kinases                        |
| TRIB3    | Tribbles homolog 3 (Drosophila)                             | 218145_AT   | 2.008 | 2.096 | Negative feedback regulator of stress-regulated genes and Akt |

### Transcription factors

|         |                                                                           |             |       |       |                                                |
|---------|---------------------------------------------------------------------------|-------------|-------|-------|------------------------------------------------|
| CCDC85B | Coiled-coil domain containing 85B                                         | 204610_S_AT | 3.436 | 6.410 | p53-induced                                    |
| ELK3    | ELK3, ETS-domain protein (SRF accessory protein 2)                        | 221773_AT   | 3.497 | 2.874 | Hypoxia, p53-regulated                         |
| KLF4    | Kruppel-like factor 4 (gut klf)                                           | 221841_S_AT | 3.185 | 2.110 |                                                |
| NR3C1   | Nuclear receptor subfamily 3, group C, member 1 (glucocorticoid receptor) | 211671_S_AT | 4.386 | 2.841 |                                                |
| RXRA    | Retinoid X receptor, alpha                                                | 202426_S_AT | 2.445 | 5.405 | Partner of retinoic acid and thyroid receptors |
| SALL1   | Sal-like 1 (Drosophila)                                                   | 206893_AT   | 4.854 | 2.299 |                                                |

### Growth factors and cytokines

|        |                                                      |             |        |       |                                   |
|--------|------------------------------------------------------|-------------|--------|-------|-----------------------------------|
| BDNF   | Brain-derived neurotrophic factor                    | 206382_S_AT | 2.083  | 2.075 | Growth factor, anti-apoptosis     |
| SLPI   | Secretory leukocyte peptidase inhibitor              | 203021_AT   | 11.779 | 9.524 | Protease inhibitor, growth factor |
| TNFSF9 | Tumor necrosis factor (ligand) superfamily, member 9 | 206907_AT   | 2.083  | 4.219 | Cytokine                          |

### Receptors and membrane-associated proteins

|          |                                                       |             |       |        |                                                                        |
|----------|-------------------------------------------------------|-------------|-------|--------|------------------------------------------------------------------------|
| C10orf38 | Chromosome 10 open reading frame 38                   | 212771_AT   | 2.439 | 2.421  | Putative membrane-associated                                           |
| CXCR4    | Chemokine (C-X-C motif) receptor 4                    | 217028_AT   | 3.876 | 2.762  | Receptor for SDF-1, HIV-1 co-receptor                                  |
| LAPTM5   | Lysosomal associated multispinning membrane protein 5 | 201721_S_AT | 5.917 | 24.331 | Membrane-associated                                                    |
| LAT2     | Linker for activation of T cells family, member 2     | 221581_S_AT | 3.968 | 6.369  | Membrane-associated                                                    |
| MEGF9    | Multiple EGF-like-domains 9                           | 212830_AT   | 2.024 | 5.405  | Putative receptor                                                      |
| NETO2    | Neuropilin (NRP) and tolloid (TLL)-like 2             | 218888_S_AT | 6.757 | 4.444  | Predicted trans-membrane protein                                       |
| PTCH1    | Patched homolog (Drosophila)                          | 209815_AT   | 2.242 | 4.310  | Receptor for Sonic Hedgehog                                            |
| SIGLEC15 | Sialic acid binding Ig-like lectin 15                 | 215856_AT   | 3.413 | 2.1786 | Receptor for sialylated glycans                                        |
| C9orf167 | Chromosome 9 open reading frame 167                   | 219620_X_AT | 2.273 | 4.5045 | Putative membrane-associated<br>Membrane-localized, internalization of |
| SH3BP4   | SH3-domain binding protein 4                          | 222258_S_AT | 2.004 | 2.0202 | transferrin receptors                                                  |
| SMAP1    | Stromal membrane-associated protein 1                 | 218137_S_AT | 2.571 | 2.8090 | Clathrin-mediated endocytosis                                          |

Other

|         |                                                                                 |             |       |        |                                              |
|---------|---------------------------------------------------------------------------------|-------------|-------|--------|----------------------------------------------|
| FAM129A | Family with sequence similarity 129, member A                                   | 217967_S_AT | 7.874 | 3.0488 |                                              |
| HPCAL1  | Hippocalcin-like 1                                                              | 212552_AT   | 5.405 | 2.1739 | Ca <sup>++</sup> binding, neuronal signaling |
| MT1H    | Metallothionein 1H                                                              | 206461_X_AT | 4.386 | 2.1598 | Metal ion binding                            |
| MT1X    | Metallothionein 1X                                                              | 204326_X_AT | 2.849 | 2.8011 | Metal ion binding                            |
| MT2A    | Metallothionein 2A                                                              | 212185_X_AT | 5.236 | 3.0864 | Metal ion binding                            |
| PLAU    | Plasminogen activator, urokinase                                                | 205479_S_AT | 2.577 | 3.5336 | Serine protease                              |
| TBC1D2  | TBC1 domain family, member 2                                                    | 222173_S_AT | 2.488 | 2.8986 | Rab GTPase activator                         |
| TGM2    | Transglutaminase 2 (C polypeptide, protein-glutamine-gamma-glutamyltransferase) | 201042_AT   | 3.086 | 5.5249 | Protein cross-linking                        |
| TREX1   | Three prime repair exonuclease 1                                                | 205875_S_AT | 2.062 | 2.2026 | DNA polymerase proof-reading function        |

---
